# Supplementary material for: Synthesis of glycosyl derivatives as dopamine prodrugs: interaction with glucose carrier GLUT-1Electronic supplementary information (ESI) available: experimental details for the preparation of all derivatives and biological assays. See http://www.rsc.org/suppdata/ob/b2/b212066f/
Source: Royal Society of Chemistry journal article supplement (doi:10.1039/b212066f), 2003-02-07
Supplement: b212066f.doc [file b212066f.doc]

**Experimental**

##### Chemistry. General. THF was distilled from Na/benzophenone and dichloromethane from CaH2, immediately prior to use. *N*,*N*-Dimethylformamide was distilled over CaH2 and was kept over molecular sieve (4Å) under argon. Unless stated otherwise, materials were obtained from commercial sources (Aldrich, Sigma, Fluka) and used without further purification. All reactions were monitored by TLC analysis carried out on 0.20 mm Merck precoated silica gel 60 F-254 plates by using UV light (254/365 nm) and 10% H2SO4 in ethanol or a solution of ammonium molibdate and ceric ammonium sulfate on H2O/H2SO4 5% as developing agent. Merck silica gel 60 (particle 230-400 "Mesh") was used for flash column chromatography. Analytical HPLC was carried out with a Water 600E multisolvent delivery system equipped with a reverse phase (C18) column (Lichrospher 100RP-18, 14.5 cm, 5 m, Merck), using as eluent different mixtures of acetonitrile, methanol and trifluoroacetic acid 5% in water, with a UV detector (Waters 484) at 280 nm. Melting points were measured with a Reicher Jung Thermovar microscoper and are uncorrected. Optical rotations were determined with a Perkin Elmer 241-MC polarimeter. 1H and 13C NMR spectra were recorded in CDCl3 or CD3OD on a Varian Gemini 200, a Bruker AMX-200, a Varian INOVA 300 or a Varian 400 spectrometer. Chemical shifts are given in ppm (). Microanalyses were performed with an Heraeus CHN-O analyzer. The synthesis of compounds 1-3, 9 and 10 was previously described.11

**Benzyl 6-*O*-trityl--D-glucopyranoside (15).** A solution of **14** (1.71 g, 6.33 mmol) in pyridine (14 mL) was treated with trityl chloride (2.65 g, 9.5 mmol) and DMAP (155 mg, 1.27 mmol) at 60 º under Ar. After 7 h, the reaction mixture was cooled at room temperature, MeOH (4 mL) added, and the solvents were evaporated. The residue was purified by flash chromatography (hexane-AcOEt, 5:1  1:1  0:1) to give **15** (2.53 g, 78%) as a solid: *Rf* 0.22 ( hexane-AcOEt, 1:2); m.p.72-74°C; []D20 – 52.0 ° (*c* 1, CHCl3); 1H NMR(200 MHz, CDCl3): 7.53-7.23 (20H, m, aromatics), 4.97 (1H, d, *J* 11.5 Hz, CH2Ph), 4.67 (1H, d, *J* 11.7 Hz, CH2Ph), 4.39 (1H, d, *J* 7.16 Hz, H-1), 3.57-3.46 (6H, m, H-2, -3, -4, -5, -6a,b), 3.17 (1H, s, HO), 2.97 (1H, d, *J* 2.0 Hz, HO), 2.78 (1H, d, *J* 1.9 Hz, HO). Anal. Found: C, 75.29; H, 6.46. Calc. for C32H32O6: C, 74.98; H, 6.29.

**Benzyl 2,3,4-tri-*O*-benzyl-6-*O*-trityl--D-glucopyranoside (16).** A solution of **15** (3.58 g, 6.99 mmol) in dry DMF (23 mL) was treated with 95% NaH (630 mg, 26.2 mmol) at 0 ºC under Ar. After 10 min, BnBr (2.74 mL, 23.1 mmol) was added and the reaction was allowed to proceed at room temperature overnight. The reaction mixture was quenched with MeOH, and concentrated. The residue was dissolved in Et2O (50 mL), washed with water (4 x30 mL), dried (Na2SO4), and concentrated. The residue was purified by flash chromatography (hexane-AcOEt, 20:1  10:1) to give **16** (4.5 g, 82%) as a syrup: *Rf* 0.29 ( hexane-AcOEt, 10:1); 1H NMR (300 MHz, CDCl3):  7.61-6.86 (35H, m, aromatics), 5.10 and 4.78 (2H, 2d, *J* 11.8 Hz, CH2Ph), 5.04 and 4.80 (2H, 2d, *J* 10.9 Hz, CH2Ph), 4.91 and 4.80 (2H, 2d, *J* 10.8 Hz, CH2Ph), 4.71 and 4.30 (2H, 2d, *J* 10.3 Hz, CH2Ph), 4.57 (1H, d, *J* 7.5 Hz, H-1), 3.85 (1H, t, *J* 9.3 Hz, H-4), 3.68-3.59 (3H, m, H-2, -3, -6b), 3.43 (1H, m, H-5), 3.28 (1H, dd, *J*10.1 and 3.8 Hz, H-6a); 13C NMR ( 50 MHz, CDCl3):  144.0, 138.6, 137.9, 137.4, 129.9-127.0, 102.3, 86.4, 84.8, 82.6, 78.0, 74.7 , 75.9, 75.0, 70.7, 62.5. Anal. Found: C, 80.92; H, 6.36. Calc. for C53H52O6: C, 81.30; H, 6.44.

**Benzyl 2,3,4-tri-*O*-benzyl--D-glucopyranoside (17).** A solution of **16** (4.41 g, 5.64 mmol) in CH2Cl2-MeOH (1:2, 56.4 mL) was treated with *p*TsOH (0.21 g, 1.13 mmol) at room temperature for 6 h. After this time, Et3N (0.16 mL, 1.13 mmol) was added, the mixture was concentrated and the residue dissolved in Et2O (60 mL). The organic solution was washed with water (2 x 30 mL), sat. NaCl (30 mL), dried (Na2SO4), and concentrated. The residue was fractionated by flash chromatography (hexane-AcOEt, 8:1  5:1  3:1) to give **17** 2.68 g, 88%) as a solid: *Rf* 0. 21 (hexane-AcOEt, 3:1); m.p.99-101°C; []D20 –10.4 ° (*c* 1, CHCl3); 1H NMR (300 MHz, CDCl3):  7.39-7.29 (20H, m, aromatics), 4.98-4.63 (8H, m, 4 CH2Ph), 4.58 (1H, d, *J* 7.8 Hz, H-1), 3.88 (1H, m, H-6a), 3.76-3.47 (4H, m, H-2, -3, -4, -6b), 3.38 (1H, m, H-5); 13C NMR (50 MHz, CDCl3): 138.6, 138.0, 137.3, 128.5-127.6, 102.9, 84.6, 82.4, 77.6, 71.6, 75.1, 75.05, 74.9, 62.1. Anal. Found: C, 75.48; H, 6.98. Calc. for C34H36O6: C, 75.53; H, 6.71.

**Benzyl 2,3,4-tri-*O*-benzyl-6-*O*-imidazolylcarbonyl--D-glucopyranoside (18).** To a solution of **17** (2.53 g, 4.69 mmol) in dioxane (5.3 mL) *N*,*N*-carbonyldiimidazol (0.91 g, 5.63 mmol) was added stirring at room temperature under Ar for 1h. After this time, the mixture was concentrated and the residue was purified by flash chromatography (hexane-AcOEt 3:1) to give **18** (2.78 g, 94%) as a solid: *Rf* 0.22 (hexane-AcOEt, 2:1); m.p.105-108°C; []D20  +28.9 ° (*c* 1, CHCl3); 1H NMR (200 MHz, CDCl3): 8.03 (1H, t, Im), 7.32 (1H, t, *J* 1.5 Hz, Im), 7.28-7.22 (20H, m, aromatics), 7.04 (1H, m, Im), 4.97-4.56 (9H, m, 4CH2Ph, H-6b), 4.51 (1H, d, *J* 7.6 Hz, H-1), 4.40 (1H, dd. *J*11.5 *y J*4.6 Hz, H-6a), 3.72-3.44 (4H, m, H-2,-3,-4,-5); 13C NMR (50 MHz, CDCl3):  148.2, 138.1, 138.0, 137.3, 136.8, 137.0, 135.1, 130.5, 128.5, 127.7, 121.8, 117.1, 102.3, 84.6, 82.0, 76.2, 72.3, 75.7, 74.9, 74.7, 71.2, 66.3. Anal. Found: C, 71.78; H, 5.98; N, 4.22. Calc. for C38H38NO7: C, 71.91; H, 6.03; N, 4.41.

**Benzyl 2,3,4-tri-*O*-benzyl-6-*O*-[*N*-(3,4-dibenzyloxyphenylethyl) aminocarbony]--D-glucopyranoside (20).** A mixture of **18** (2.78 g, 4.39 mmol), **19** (1.63 g, 3.65 mmol), Et3N (5mL), and THF (15 mL) was stirred at 80 ºC under Ar for 8 h. After this time, the solvents were removed and the residue was purified by flash chromatography (toluene-AcOEt 15:1  10:1) to give **20** (2.87 g, 87%) as a solid: *Rf* 0.39 (Et2O-hexane, 2:1); m.p.122-124°C; []D20 –3.6 ° (*c* 1, CHCl3); 1H NMR(300 MHz, CDCl3): 7.44-7.24 (30H, aromatics), 6.85 (1H, d, *J* 8.2 Hz, H-5 Ar), 6.77 (1H, brs, H-2 Ar), 6.71 (1H, dd, *J* 8.2 and 2.0 Hz, H-6 Ar), 5.12 (2H, s, CH2-Ph), 5.09 (2H, s, CH2-Ph), 4.96-4.56 (8H, m, 4CH2-Ph), 4.50 (1H, d, *J* 7.7 Hz, H-1), 4.35 (2H, brs, H-6a, -6b), 3.71-3.47 (4H, m, H-2, -3, -4 y -5), 3.38-3.34 (2H, m, CH2-NH), 2.70 (2H, t, *J* 7.0 Hz, CH2-Ar); 13C RMN (50 MHz, CDCl3)*:*  156.0, 148.0, 149.0, 138.3-137.4, 132.0, 128.4-127.2, 121.7, 116.1, 115.5, 102.4, 84.6, 82,2, 75.6, 73.2, 74.9, 74.8, 71.4, 71.1, 63.3, 42.3, 35.5. Anal. Found: C, 75.83; H, 6.73: N, 1.55. Calc. for C57H57NO9: C, 76.06; H, 6.38; N, 1.56.

**Benzyl 2,4,6-tri-*O*-benzyl-3-*O*-[*N*-(3,4-dibenzyloxyphenylethyl) aminocarbony]--D-glucopyranoside (23).** A mixture of **14** (600 mg, 2.22 mmol), BnCl ( 6.4 mL, 55 mmol), and powder KOH (572 mg, 10.2 mmol), was stirred at 100 ºC under Ar for 4 h. After this time, CHCl3 (15 mL) and water (15 mL) were added, the aqueous solution separated and washed with CHCl3 (2 x 5 mL). The organic layers were combined and washed with water (10 mL), 0.5 M H2SO4 (10 mL), and water (10 mL), dried (Na2SO4), and concentrated. The residue was eluted through a column chromatography (hexane-Et2O, 5:1) to give **21** (420 mg, 35%) as a syrup. Compound **21** (50 mg, 0.093 mmol), in THF (0.7 mL) was treated with *N*,*N*-carbonyldiimidazol (18 mg, 0.111 mmol) at room temperature under Ar for 48 h. After this time, the reaction mixture was concentrated and the residue purified (hexane-AcOEt, 7:3) to give **22** (48 mg, 82 %) which turned out to be unstable. Compound **22** was couple with **19** under the same conditions described above for the preparation of **20** for 16 h. After this time, the mixture was concentrated and the residue was purified by flash chromatography (toluene-AcOEt, 2:1) to give **23** (56 mg, 58%) as a solid: *Rf* 0.42 (hexane-AcOEt, 2:1); m.p. 125-127 ºC; []D20 –5.6 (*c* 1, CHCl3); 1H NMR(300 MHz, CDCl3): 7.39-7.13 (30H, aromatics), 6.76 (1H, d, *J* 8.2, H-5 Ar), 6.69 (1H, brs, H-2 Ar), 6.57 (1H, d, H-6 Ar), 5.10 (1H, m, H-3), 5.05 ( 2H, s, CH2-Ph), 5.02 (2H, s, CH2-Ph), 4.94-4.38 (9H, m), 4.53 (1H, d, *J* 7.51, H-1), 3.72-3.64 (2H, m, H-6a, -6b), 3.54-3.46 (3H, m, H-2, -4, –5), 3.33 (2H, m, CH2-NH), 2.61 (2H, t, CH2-Ar); 13C NMR (75 MHz, CDCl3):  155.5, 148.9, 137.3, 132.1, 128.4-127.2, 121.5, 115.6, 115.3, 103.4, 79.4, 76.6, 76.1, 74.5, 74.1, 73.9, 73.5, 71.3, 71.2, 68.6, 42.2, 35.7. Anal. Found: C, 75.87; H, 6.60; N, 1.71. Calc. for C57H57NO9: C, 76.06; H, 6.38; N, 1.56.

**2,3,4,6-Tetra-*O*-benzyl-1-*O*-imidazolylcarbonyl-- and -D-glucopyranose (25 and 27).** *Method A*: A solution of **24** (50 mg, 0.093 mmol) in Et2O (0.7 mL) was treated with *N*,*N*-carbonyldiimidazol (18 mg, 0.111 mmol) at room temperature under Ar. After 1 h more *N*,*N*-carbonyldiimidazol (22 mg) was added and the reaction was allowed to continue for 5h. After this time, the mixture was concentrated and the residue purified by flash chromatography (hexane-AcOEt, 7:3) to give a 4:1 mixture of **25** and **27** (58 mg, 98%) as determined by 1H NMR (200 MHz, CDCl3):  8.14 (<1H, t, *J* 1.2 Hz, H-2 Im), 7.98 (1H, t, *J* 1.3 Hz, H-4, Im), 7.34-7.20 (20H, m, aromatics), 7.09 (<1H, m, H-5 Im), 7.05 (<1H, m, H-5 Im), 6.43 (<1H, d, *J* 3.4 Hz, H-1), 5.76 (<1H, d, *J* 7.4 Hz, H-1), 4.96-4.44 (8H, m, 4 CH2Ph), 3.94-3.70 (5H, m, H-2, -3, -4, -5, –6a), 3.64 (1H, dd, *J* 10.9 and *J* 1.83 Hz, H-6b). *Method B*: A mixture of **24** (40 mg, 0.074 mmol), (Bu3Sn)2O (0.038 mL, 0.074 mmol), and molecular sieve 3 Å (74 mg), in toluene (1.5 mL) was stirred at 120 ºC for 2 h. After this time, the reaction mixture was cooled at room temperature and, then, *N*,*N*-carbonyldiimidazol (23 mg, 0.14 mmol) was added, stirring at this temperature for 1.5 h. The reaction mixture was filtered on a pad of Celite, and the filtrate concentrated. The residue was purified by flash chromatography (hexane-AcOEt, 7:3) to give a 2:3 mixture of **25** and **27** (44 mg, 94 %) as determined by 1H NMR.

**2,3,4,6-Tetra-*O*-benzyl-1-*O*-[*N*-(3,4-dibenzyloxyphenylethyl)aminocarbony]--D-glucopyranose (26).** A 4:1 mixture of **25** and **27 (**58 mg, 0092 mmol) obtained as described above, in THF (0.7 mL) was treated with **19** (34 mg, 0.076 mmol) in the presence of Et3N (0.3 mL), stirring at 80 ºC under Ar for 5h. After this time, the reaction mixture was concentrated and the residue purified by flash chromatography (toluene-AcOEt, 15:1) to give **26** (48 mg, 48%) as a solid: m.p.105-109 ºC; []D20 +30.1° (*c* 1, CHCl3); 1H NMR (200 MHz, CDCl3): 7.46-7.10 (30H, aromatics), 6.86 (1H, d, *J* 8.2 Hz*,* H-5 Ar), 6.79 (1H, d, *J* 1.8 Hz*,* H-2 Ar), 6.69 (1H, dd, *J* 8.2 and 1.8 Hz, H-6 Ar), 6.30 (1H, d, *J* 3.3 Hz, H-1), 5.13 (4H, s, 2 CH2Ph), 4.96 (1H, d, *J* 10.8 Hz, CH2Ph), 4.80 (1H, d, *J* 10.8 Hz, CH2Ph), 4.84 (1H, d, *J* 10.4 Hz, CH2Ph), 4.78 (1H, d, *J* 1.9 Hz, NH), 4.49 (1H, d, *J* 10.4 Hz, CH2Ph), 4.70 (1H, d, *J* 7.7 Hz, CH2Ph), 4.61 (1H, d, *J* 7.7, CH2Ph), 4.62 (1H, d, *J* 12.1 Hz, CH2Ph), 4.46 (1H, d, *J* 12.1 Hz*,* CH2Ph), 3.91-3.62 (6H, m, H-2, -3, -4, -5, -6a,b), 3.40 (2H, m, CH2NH), 2.73 (2H, t, *J* 7.0Hz, CH2Ar); 13C NMR (50 MHz, CDCl3):  154.6, 149.3, 148.0, 132.0, 138.7-137.3, 128.4-127.3, 121.8, 116.1, 115.8, 90.8, 68.4, 42.2, 35.4. Anal. Found: C, 75.90; H, 6.63; N, 1.65. Calc. for C57H57NO9: C, 76.06; H, 6.38; N, 1.56.

***N*-(*N’*-*tert*-butoxycarbonyl)phenylalanyl-3,4-dibenzyloxyphenylethylamine (30).** To a mixture of **19** (582 mg, 1.3 mmol) and **29** (345 mg, 1.3 mmol) in THF (13.4 mL), Et3N (0.72 mL, 5.21 mmol) and BOP (633 mg, 1.43 mmol) were added stirring at room temperature for 1h. After this time, the reaction mixture was diluted with CH2Cl2 (50 mL), washed with water (2 x 20 mL), dried (Na2SO4), and concentrated. The residue was purified by flash chromatography (hexane-AcOEt, 2:1) to give **30** (680 mg, 90%) as a solid: *Rf* 0.24 (hexane-AcOEt, 2:1); m.p.160-163°C; []D20 +3.8 ° (*c* 1, CHCl3:CH3OH, 1:1); 1H NMR (400 MHz, CDCl3): 7.43-7.13 (15H, m, aromatics), 6.83 (1H, d, *J* 8.2 Hz, H-5 Ar), 6.71 (1H, d, *J* 2.0 Hz, H-2 Ar), 6.54 (1H, dd, *J* 8.2 and *J* 2.0 Hz, H-6 Ar), 5.6 (1H, brs, NH), 5.10 (2H, s, OCH2Ph), 5.09 (2H, s, OCH2Ph), 4.99 (1H, brs, NH), 4.19 (1H, m, CH Phe), 3.40-3.25 (2H, m, CH2NH), 3.07-2.91 (2H, m, CH2-Ar), 2.61-2.44 (2H, m, CH2-Ar), 1.37 (9H, s, 3CH3); 13C NMR (50 MHz, CDCl3):  171.2, 149.2, 147.8, 137.4, 137.2, 136.7, 132.1, 132.1-126.8, 121.6, 115.8, 80.2, 71.5, 40.5, 38.7, 34.9, 29.2. Anal. Found: C, 74.29; H, 6.85; N, 4.76. Calc. for C36H40N2O5: C, 74.46; H, 6.94; N, 4.82.

***N*-phenylalanyl-3,4-dibenzyloxyphenylethylammonium trifluoracetate (31).** A solution of **30** (428 mg, 0.74 mmol) in dry CH2Cl2 (13.5 mL) was treated with TFA (1.5 mL) at room temperature for 2 h. After this time, the reaction mixture was concentrated and the residue was purified by flash chromatography (CH2Cl2-MeOH, 30:1) to give **31** (394 mg, 90%) as a solid: *Rf* 0.47 (CH2Cl2-MeOH, 10:1); m.p. 84-85°C; []D20 –44.1 ° (*c* 1, CHCl3:CH3OH, 1:1); 1H NMR (300 MHz, CDCl3): 7.37-7.11 (15H, aromatics), 6.79 (1H, d, *J* 8.2 Hz, H-5Ar), 6.71 (1H,d, *J* 2.1 Hz, H-2 Ar), 6.58 (1H, dd, *J* 8.2 and 2.1 Hz, H-6 Ar), 5.05 (4H, 2 OCH2-Ph), 3.46 (1H, dd, *J* 9.2 and 4.1 Hz, CHPhe), 3.38 (2H, m, CH2NH), 3.16 (1H, dd, *J* 4.1 and 13.7 Hz, CHPhe), 2.61 (2H, t, *J* 7.03 Hz, CH2-Ar), 2.58 (1H, dd, *J* 9.2 and 13.7); 13C NMR ( 50 MHz, CDCl3):  174.0, 149.2, 147.8, 138.0, 137.5, 137.4, 132.5, 129.3-126.8, 121.7, 116.1, 115.8, 71.6, 56.5, 41.1, 40.2, 35.3. Anal. Found: C, 66.94; H, 5.40; N, 4.76. Calc. for C33H33F3N2O5: C, 66.66; H, 5.59; N, 4.71.

***N-*[*N’*-(benzyl 2,3,4-tri-*O*-benzyl--D-glucopyranoside 6-*O*-carbonyl)-phenylalanyl]-3,4-dibenzyloxyphenylethylamine (32).** A mixture of **31** (440 mg, 0.74 mmol), **18** (562 mg, 0.886 mmol), Et3N (2 mL) in THF (6 mL) was heated at 80 ºC under Ar for 12 h. After this time, the reaction mixture was concentrated and the residue purified by flash chromatography (hexane-AcOEt, 4:1  1:1  1:2  AcOEt) to give **32** (600 mg, 78%) as a white solid: *Rf* 0.40 (hexane-AcOEt, 1:1); m.p.171-173°C; []D20 –5.2 ° (*c* 1, CHCl3); 1H NMR (400 MHz, CDCl3): 7.38-7.05 (25H, aromatics), 6.75 (1H, d, *J* 8.15 Hz, H-5 Ar), 6.63 (1H, d, *J* 1.9 Hz, H-2), 6.46 (1H, dd, *J* 8.2 and 1.9 Hz, H-6 Ar), 5.49 (1H, brs, NH), 5.03 (4H, s, 2OCH2Ph), 4.90-4.53 (7H, m), 4.41 (1H, d, *J* 7.8 Hz, H-1*),* 4.37 (1H, d, *J* 10.4 Hz, CH2Ph), 4.24 (2H, brs, H-6a,b), 4.20 (1H, m, CH Phe), 3.56 (1H, t, *J* 8.8 Hz), 3.43-3.38 (3H, m), 3.31-3.24 (2H, m, CH2NH), 2.98 (1H, dd, *J* 6.3 y 13.6 Hz, CH2Ph Phe), 2.90 (1H, dd, *J* 7.7 and 13.6, CH2-Ph Phe); 13C NMR (50 MHz, CDCl3):  170.4, 155.5, 149.0, 147.7, 138.4-136.4, 131.8, 129.2-127.0, 121.5, 115.5, 115.3, 103.4, 84.5, 82.1, 77.3, 75.7-71.2, 63.7 6, 40.6, 38.8, 34.9. Anal. Found: C, 75.56; H, 6.20; N, 2.20. Calc. for C66H66N2O10: C, 75.69; H, 6.35; N, 2.67

**Deprotection of Glycosyl Dopamine Derivatives. – General Procedure:** A solution of the glycoconjugate (0.01M) in AcOEt-MeOH-toluene (4:3:3) was hydrogenolyzed over 10% Pd/C (1.1 g per mmol) for 1-5 h, when TLC (AcOEt-AcOH-MeOH, 4:1:1) showed the complete conversion into a product. The reaction mixture was filtered through Celite, and concentrated. The residue was dissolved in CH3CH-water (95:5) and freeze-dried, to give **4**-**8**.

**6-*O*-[*N*-(3,4-dihydroxyphenylethyl)aminocarbony]--D-glucopyranose (4).** By using the general procedure, **20** was hydrogenated to give **4** (quantitative): *Rf* 0.39 AcOEt-H2O-AcOH, 4:1:1); m.p102-105°C; []D20 +33.8 ° (*c* 1, CH3OH); 1H NMR (300 MHz, CD3OD): 6.87 (1H, d, *J* 7.9 Hz, H-5 Ar), 6.83 (1H, d, *J* 1.9 Hz, H-2 Ar), 6.71 (1H, dd, *J* 7.9 and 1.9 Hz, H-5 Ar), 5.26 (<1 H, d, *J* 3.7 Hz, H-1), 4.65 (<1 H, d, *J* 7.7, H-1), 4.52 (< 1 H, dd, *J* 2.07 and *J* 11.8 Hz, H-6b), 4.46 (<1 H, dd, *J* 2.4 and *J*12.0 Hz, H-6b), 4.43-4.33 (1H, m, H-6), 4.09 (<1 H, m, H-5), 3.86 (<1 H, t, *J* 9.3 Hz, H-3), 3.61-3.47 (2.5 H, m, H-2, -3, -4, -5), 3.43 (2H, t, *J* 7.3 Hz, CH2NH), 3.31 (2H, t, *J* 8.0 Hz, H-2), 2.81 (2H, t, *J* 7.3 Hz, CH2Ar); 13C NMR (50 MHz, CD3OD): 159.0, 146.2, 144.7, 132.1, 121.0, 116.9, 116.4, 98.2, 93.0, 77.9, 75.8, 73.8, 71.8 , 71.6, 76.2, 74.7 , 71.7, 65.1, 43.7, 36.4. Anal. Found: C, 49.95; H, 5.75; N, 3.96. Calc. for C15H21NO9: C, 50.14; H, 5.89; N, 3.90.

**3-*O*-[*N*-(3,4-dihydroxyphenylethyl)aminocarbony]--D-glucopyranose (5).** By using the general procedure, **23** was hydrogenated to give **5** (54%): *Rf* 0.28 ( AcOEt-AcOH-H2O, 4:1:1); m.p.95-98 ºC; []D20 +32.0 º (*c* 1, CH3OH); 1H NMR (300 MHz, D2O): 6.70 (1H, d, *J* 8.1 Hz, H-5 Ar), 6.65 (1H, d, *J* 1.7 Hz, H-2 Ar), 6.56 (1H, dd, *J* 1.7 and *J* 8.1 Hz, H-6 Ar), 5.08 (<1H, d, *J* 3.8 Hz, H-1), 4.75 (1H, m, H-3,), 4.55 (<1H, d, *J* 7.9 Hz, H-1), 3.73 (1H, d, *J* 12.0 Hz, H-6a ,), 3.63 (1H, m, H-4,), 3.56 (1H, dd, *J* 4.8 and 12.0 Hz, H-6b,), 3.47 (<1H, dd, *J* 3.54 and *J* 9.8 Hz, H-2), 3.36 (1.5H, m, H-2,-5,), 3.18 (2H, m, CH2NH), 2.54 (2H, m, CH2Ar); 13C NMR (75 MHz, D2O):  158.5, 158.3, 143.9, 142.4, 132.4, 121.3, 116.8, 116.4, 95.9, 92.2, 78.0, 75.9, 75.8,72.7, 71.4, 70.1, 60.7, 60.5, 42.0, 34.4. Anal. Found: C, 50.20; H, 5.79; N, 3.95. Calc. for C15H21NO9: C, 50.14; H, 5.89; N, 3.90.

**1-*O*-[*N*-(3,4-dibenzyloxyphenylethyl)aminocarbony]--D-glucopyranose (6).** By using the general procedure, **26** was hydrogenated to give **6** (94%): *Rf* 0.44 ( AcOEt-AcOH-H2O, 4:1:1); m.p.105-110 ºC; []D20 +31.0 º (*c* 0.2, CH3OH); 1H NMR (300 MHz, D2O):  6.68 (1H, d, *J* 8.1 Hz, H-5 Ar), 6.63 (1H, d, *J* 1.8 Hz, H-2 A), 6.54 (1H, dd, *J* 8.1 and 1.8 Hz, H-6 Ar), 5.68 (1H, d, *J* 3.3 Hz, H-1), 3.64-3.25 (7H, m, H-2,-3,-4,-5,-6a,-6b, NH), 3.16 (2H, t, *J* 6.2 Hz, CH2Ar), 2.54 (2H, m, CH2NH); 13C NMR (75 MHz, D2O):  157.6, 144.8, 143.3, 133.0, 122.3, 117.8, 117.1, 93.7, 74.4, 73.7, 71.2, 69.7, 61.0, 42.6, 35.2; MS-ES (positive-ion): 360.3 (M+1), 377.3 (M+NH4+), 382.3 (M+Na).

**1-*O*-[*N*-(3,4-dibenzyloxyphenylethyl)aminocarbony]--D-glucopyranose (7).** By using the general procedure, **28** was hydrogenated to give **7** (99%): *Rf* 0.44 ( AcOEt-AcOH-H2O, 4:1:1); m.p.120-125 ºC; []D20 0 º (*c* 0.93, CH3OH); 1H NMR (300 MHz, D2O): 6.63 (1H, d, *J* 8.1 Hz, H-5 Ar), 6.58 (1H, d, *J* 1.8 Hz, H-2 Ar), 6.49 (1H, dd, *J* 1.8 and 8.1 Hz, H-6 Ar), 5.11 (1H, d, *J* 8.1 Hz, H-1), 3.66 (1H, dd, *J*12.5 and 1.9 Hz, H-6b), 3.50 (1H, dd, *J*12.5 and5.3 Hz, H-6a), 3.37-3.28 (2H, m, H-5, -3), 3.23- 3.19 (2H, m, H-2, -4)*,* 3.13 (2H, t, *J* 6.3 Hz, CH2NH), 2.48 (2H, t, *J* 6.7 Hz, CH2Ar); 13C NMR (50 MHz, D2O):  158.4, 146.0, 144.4, 134.2, 123.3, 118.8, 118.4, 97.0, 78.5, 77.6, 74.1, 71.4, 62.6, 44.0, 36.2; MS-ES (positive-ion): 360.3 (M+1), 377.3 (M+NH4+), 382.3 (M+Na).

***N-*[*N’*-(,-D-glucopyranose 6-*O*-carbonyl)-phenylalanyl]-3,4-dibenzyloxyphenyl ethylamine (8).** By using the general procedure, **32** was hydrogenated to give **8** (98%): *Rf* 0.45 (AcOEt-H2O-AcOH, 4:1:1); m.p. 115-120 ºC; []D20 +16.6 º (*c* 1, CH3OH); 1H NMR (300 MHz, CD3OD): 7.48-7.38 (5H, aromatics), 6.86 (1H, d, *J* 8.0 Hz, H-5 Ar), 6.81 (1H, d, *J* 1.8 Hz, H-2 Ar), 6.66 (1H, dd, *J* 8.0 and 1.8 Hz, H-6 Ar), 5.26 (<1H, d, *J* 3.5 Hz, H-1), 4.66 (<1H d, *J* 7.8 Hz, H-1), 4.52 (<1H, m, H-6,), 4.12 (<1H, m, H-5), 3.86 (1H, t, *J* 9.3 Hz, H-4,), 3.63-3.37 (4H, m, H-2, -5, -3,, CH2NH), 3.31 (<1H, t, *J* 8.1 Hz, H-2), 3.22 (1H, dd, *J* 6.0 and 13.8 Hz, CH2Ph, Phe), 3.02 (1H, dd, J 8.7 and 13.8 Hz), 2.73 (2H, t, *J* 7.3 Hz, CH2Ar); 13C NMR (50 MHz, CD3OD): 173.8, 158.1, 146.2, 144.5, 138.4, 131.9, 130.2, 129.4, 127.7, 121.0, 116.8, 116.5, 98.1, 93.9, 77.9, 70.0, 65.6, 57.9, 42.1, 39.3; MS-ES (negative-ion): 505.1 (M-1), 325.1 (M-Glu), 541.1 (M+Cl).

**Benzyl 2,3,4-tri-*O*-benzyl--D-glucopyranoside 6-(hydrogen succinate) (33).** A solution of **17** (0.7 g, 1.3 mmol) in pyridine (10 mL) was treated with succinic anhydride (1.04 g, 10.4 mmol) and DMAP (2 mg, 0.013 mmol) stirring at room temperature for 16 h. The mixture was concentrated and the residue was dissolved in CH2Cl2 (50 mL) and washed successively with 5% aqueous HCl (3x15 mL), sat. aqueous NaHCO3 (3x15 mL), and water (3x15 mL). The organic solution was dried (Na2SO4), and concentrated to give **33** (0.83 g, 99%) as a solid: *Rf* 0.56 (hexane-AcOEt, 2:1); m.p. 75-80 ºC; []D20  –7.7 º (*c* 1, CHCl3); 1H NMR (300 MHz, CDCl3*):* 7.37-7.23 (20H, aromatics), 4.97-4.56 (8H, m, CH2-Ph), 4.51 (1H, d, *J* 7.7 Hz, H-1), 4.40 (1H,dd, *J* 1.89 and 11.8 Hz, H-6b), 4.30 (1H, dd, *J* 4.4 and 11.8 Hz, H-6a), 3.69-3.47 (4H, H-2,-3,-4,-5), 2.64 (4H, s, CH2CO). Anal. Found: C, 70.00; H, 6.46. Calc. for C38H40O9·H2O: C, 69.29; H, 6.43.

***N*-Benzyloxycarbonyl-3,4-dihydroxy-3-*O*- and 4-*O*-[(benzyl 2,3,4-tri-O-benzyl--D-glucopyranoside 6-yl)-succinyl]-phenylethylamine (35 and 36) and *N*-benzyloxycarbonyl-3,4-dihydroxy-3,4-di-*O*-[(benzyl 2,3,4-tri-O-benzyl--D-glucopyranoside 6-yl)-succinyl]-phenylethylamine (37).** A solution of **33** (484 mg, 0.76 mmol) in CH2Cl2 (2.5 mL) was added dropwise to a solution of **34** (146 mg, 0.5 mmol) and *N*,*N’*-diisopropylcarbodiimide (158 l, 1.0 mmol) in CH2Cl2 (10 ml) at 0 ºC. The mixture was allowed to stir24 h at room temperature under Ar, then, diluted with CH2Cl2 (15 mL), washed with 1N KHSO4 (2x10 mL), sat. aqueous NaHCO3 (2x10 mL), water (2x10 mL), and sat. NaCl (10 mL). The organic solution was dried (Na2SO4), the solvent removed under reduced pressure, and the residue purified by flash chromatography (hexane-AcOEt, 3:1  toluene-AcOEt, 6:1), to give **37** (150 mg, 20%), and approximately a 1:1 mixture of **35** and **36** (240 mg, 52%). **37**: *Rf* 0.375 (toluene-AcOEt 5:1); []D20–5.1 º (*c* 1, CHCl3); 1H NMR (300 MHz, CDCl3):  7.34-7.25 (45H, m, aromatics), 6.99 (1H, d, H-5 Ar), 6.86 (2H, brs, H-2, H-6 Ar), 5.10 (2H, s, CH2Ph), 4.97-4.54 (16H, m, CH2Ph), 4.51 (2H, d, *J* 7.7 Hz, H-1), 4.41 (2H, m, H-6b), 4.31 (2H, dd, *J* 4.4 and 11.6 Hz, H-6a), 3.69-3.48 (8H, m, H-2, -3, -4 y –5), 3.37 (2H, m, CH2NH), 2.91-2.86 (4H, m, 2 CH2CO), 2.74-2.70 (6H, m, CH2Ar, 2CH2CO); 13C NMR (50 MHz, CDCl3): ** 171.8, 169.9, 169.8, 156.2, 142.0, 140.7, 138.5-136.6, 128.4-127.7, 126.9, 123.6, 127.5, 102.5, 84.7, 82.3, 77.4, 72.9, 75.0, 75.7, 74.9, 71.2, 66.7, 63.6, 42.0, 35.5, 28.8. Anal. Found: C, 71.90; H, 6.12; N, 0.88. Calc. for C92H93NO20: C, 72.11; H, 6.07; N, 0.91. Compound **35**/**36**: *Rf*  0.16 (toluene-AcOEt, 5:1); 1H NMR (300 MHz, CDCl3): 7.40-7.22 (25H, aromatics), 6.94-6.43 (3H, m, H-5, -2 y –6), 5.11 (2H, s, COOCH2Ph), 5.02-4.54 (9H, m, 4 CH2Ph, NH), 4.52 (1H, d, *J* 7.7 Hz, H-1), 4.43 (1H, dd, *J* 2.0 and *J* 12.1 Hz, H-6b), 4.3 (1H, dd, *J* 4.3 and *J* 12.0 Hz, H-6a), 3.67-3.51 (4H, m, H-2, -3, -4 y –5), 3.49-3.39 (2H, m, CH2NH), 2.83-2.80 (4H, 2 CH2COO-), 2.76-2.70 (2H, CH2Ar); 13C NMR (50 MHz, CDCl3): 138.4, 128.5, 126.7, 122.5, 120.7, 117.7, 102.5, 84.8, 82.2, 75.8, 71.3, 29.7, 29.3. Anal. Found: C, 71.32; H, 5.96; N, 1.44. Calc. for C54H55NO12: C, 71.27; H, 6.09; N, 1.54.

**3,4-Dihydroxy-3-*O*- and 4-*O*-[(-D-glucopyranose 6-yl)-succinyl]-phenylethylamine (11 and 12).** The mixture of **35** and **36** (145 mg, 0.16 mmol) in 1:1 AcOEt-MeOH (2 mL) was treated with TFA (20 l, 0.25 mmol) and Pd-C (69 mg), stirring under hydrogen for 12 h. The reaction mixture was filtered and concentrated, and the residue was dissolved in CH3NO2-water (95:5) and freeze-dried, to give approximately a 1:1 mixture of **11** and **12** (82mg, 98 %): *Rf*  0.23 (AcOEt-AcOH-H2O, 4:2:1); 1H NMR (300 MHz, CD3OD):  7.19 (1.5H, m, H-2, -5, -6 Ar of **11**), 7.09 (0.5H, d, *J* 8.2 Hz, H-5Ar of **12**), 7.02 (0.5H, d, *J* 1.7 Hz, H-2Ar of **12**), 6.94 (0.5H, dd, *J* 1.7 and 8.2 Hz, H-6Ar of **12**), 5.26 (0.5H, d, *J* 3.7 Hz, H-1), 4.68-4.56 (1.5H, m, H-6b, H-1), 4.48-4.38 (1H, m, H-6a), 4.17 (0.5H, m, H-5), 3.86 (0.5H, m, H-3), 3.68 (0.5H, m, H-5), 3.57-3.43 (1.5H, m), 3.32 (2H, m, CH2NH), 3.14-2.93 (6H, m, 2CH2CO, CH2Ar).

**3,4-Dihydroxy-3,4-di-*O*-[(-D-glucopyranose 6-yl)-succinyl]-phenylethylamine (13).** Compund **37** was hydrogenated as described for the mixture of **35** and **36**, to give **13** (99%) as a solid: *Rf*  0.20 (AcOEt-AcOH-H2O, 4:2:1); mp65-70 ºC; []D20 **+**28.4º (*c* 1, CH3OH); 1H RMN (300 MHz, CD3OD): 7.41-7.37 (3H, m, H-2, -5, -6 Ar), 5.27 (1H, *J* 3.7 Hz, H-1), 4.67 y 4.59 (2H, 2dd, H-6b), 4.48-4.37 (2H, m, H-6a), 4.20-4.14 (1H, m, H-5), 3.86 (1H, m, H-2), 3.69-3.67 (1H, m, H-5), 3.58-3.52 (2H, m), 3.39 (2H, t, *J* 7.3 Hz, CH2NH ), 3.35-3.31 (3H, m), 3.19-3.11 (6H, m, 2 CH2CO, CH2Ar), 3.02-2.92 (4H, m, 2 CH2CO); 13C RMN (50 MHz, CD3OD): 173.9, 172.1 y 172.0, 143.9, 142.8, 137.0, 128.2, 125.1, 98.3, 94.0, 78.0, 76.2, 75.3, 74.8, 73.7, 72.0, 71.7, 70.7, 65.3, 45.8, 41.7, 29.8.

**Stability Studies.** All incubations were carried at 37 C in a shaker (Adolf Kühner AG CH-4127) at 200 rpm. At various time intervals aliquots were removed and immediately analysed by HPLC. The mobile phase was water (0.1% TFA) / CH3CN at different proportion for each compound**.** The flow rate was fixed at 0.5 ml min-1 for all the experiments.

*Stability in plasma***.** To 10 ml of rat blood was added 90 l of EDTA and the suspension was centrifuged at 10000 xg for 15 min. Plasma was kept in eppendorf tubes at 4 C and it was used inmediately for the stability studies. Bioactivation experiments were initiated by adding a solution (50 l, 10 mM, in phosphate buffer 0.1M, pH = 7.01) of glycoconjugate or dopamine, to 950 l of plasma preincubated at 37 C (final compounds concentration 0.5 mM). Aliquots (50 l) were removed and 0.8N HClO4 (50 l) was added. The resulting mixtures were centrifuged (15000 xg, 15 min, 4 C) to remove precipitated proteins. A 50 l aliquot of the supernatant layer was subjected to HPLC analyses.

*Stability in rat brain extract*.The entire rat brain was removed after incision of the skull, rinsed with phosphate buffer, dried, weighed (6.78 g) and then homogenized in phosphate buffer (0.1 M, pH = 7.3) (brain/phosphate buffer, 1:4 w/v) using a mechanical tissue homogeneizer for 5 min, at 4 C. The homogenate was centrifuged at 60000 xg for 35 min, at 4 C, and the supernatant was aliquoted and stored at -80 C until be used for the experimental studies. The glycoconjugate or dopamine (50 l of stock solution 10.0 mM) was incubated at 37 C with brain preparation (950 l) (final concentration 0.5 mM). At various time points, 50 l were removed and treated as described for plasma experiments.

**Affinity studies for GLUT-1.** *Preparation of erythrocytes.* Fresh erythrocytes drawn from a healthy blood donor, collected on EDTA and remaining after removal of platelets and leukocytes, were washed at room temperature in six volumes of isotonic phosphate buffered saline (PBS, 25 mM, NaCl 1%, pH = 7.4), centrifuged at 4 C ( 15 min, 2500xg, Sorvall SS-3), resuspended for 20 min at 37 C with fresh PBS, and centrifuged and washed three more times in the same way at room temperature. The erythrocytes thus obtained were resuspended in PBS to the initial blood volume and kept at 4 C.

*Inhibition of the glucose uptake by the glucosyl dopamine derivatives.* [1-14C]D-glucose (56 mCi/mmol) was purchased from Amersham (CFA.349). On an Eppendorf microtube, to 40 l of erythrocytes-PBS suspension, 10 l of compound solution in PBS was added. After 2 min of incubation at room temperature, glucose uptake was started by the addition of 10 l of [1-14C] D-glucose (final concentration 1 mM). Preliminary experiments showed that glucose uptake was linear with time up to 10 s. So, after this time, glucose uptake was stopped by adding 500 l of an ice-cold blocking solution13,14 containing HgCl2 (2 mM), in an isotonic aqueous solution of NaCl (1%) and KI (1.25 mM). The resulting suspension was immediately centrifuged (3 min, 7500 rpm, Hermle Z 160 M). The upper solution was removed by aspiration and the cell pellet was washed with 500 l of blocking solution. Then the pellet was treated with 1 ml of aqueous 6% trichloroacetic acid, centrifuged (3 min, 7500 rpm), and the deproteinized supernatant was counted by liquid scintillation (Wallac 1410 Pharmacia Liquid Scintillation Counter). As control (100% of glucose uptake) we considered the glucose uptake by the erythrocytes in the absence of inhibitor. All measures were corrected by blanks obtained by adding ice-cold blocking solution (500 l) previously to the addition of 10 l of [1-14C] D-glucose. The concentration of compound that inhibited glucose uptake by 50% (IC50) was calculated from sigmoidal dose-response curves. Data analysis was performed with GraphPad Software (version 2.1) (GraphPad, San Diego, CA, USA).
